# Supplementary material for: Adsorption of Pb2+ Ions from Aqueous Solution onto Porous Kappa-Carrageenan/Cellulose Hydrogels: Isotherm and Kinetics Study
Source: MDPI journal article supplement (doi:10.3390/su15129534), 2023-06-14
Supplement: s1 [file s1]

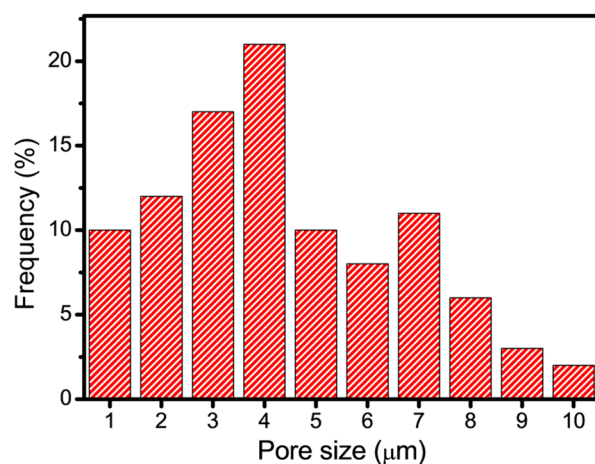

**Figure S1.** Pore size measurements of  $\kappa$ -CG/CL hydrogel.

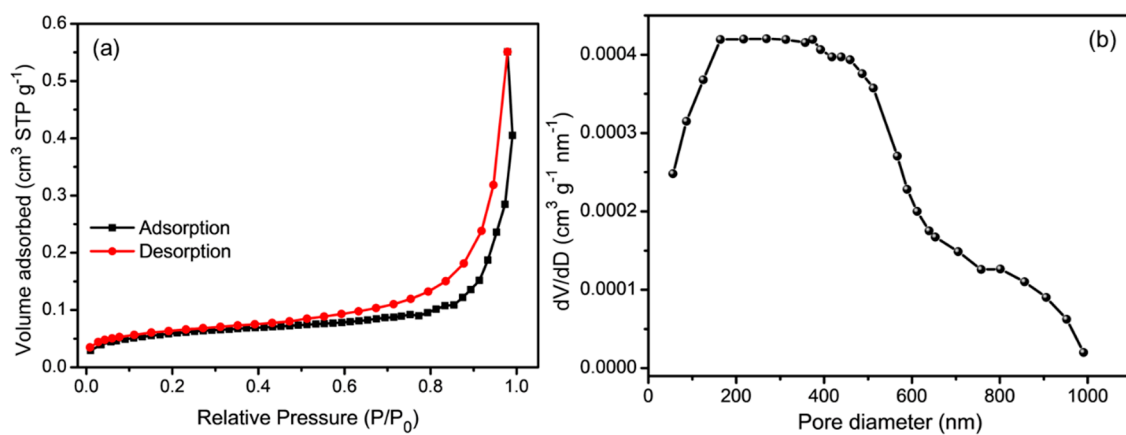

**Figure S2.** (a) BET analysis and (b) pore size distribution of the  $\kappa$ -CG/CL hydrogel.

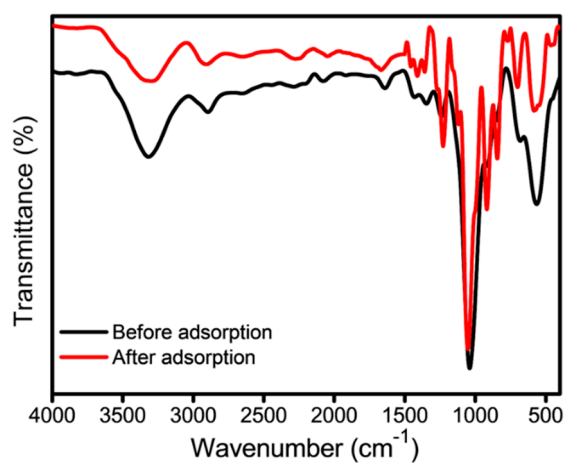

**Figure S3.** FTIR spectra of  $\kappa$ -CG/CL hydrogel before and after  $\text{Pb}^{2+}$  ions adsorption.

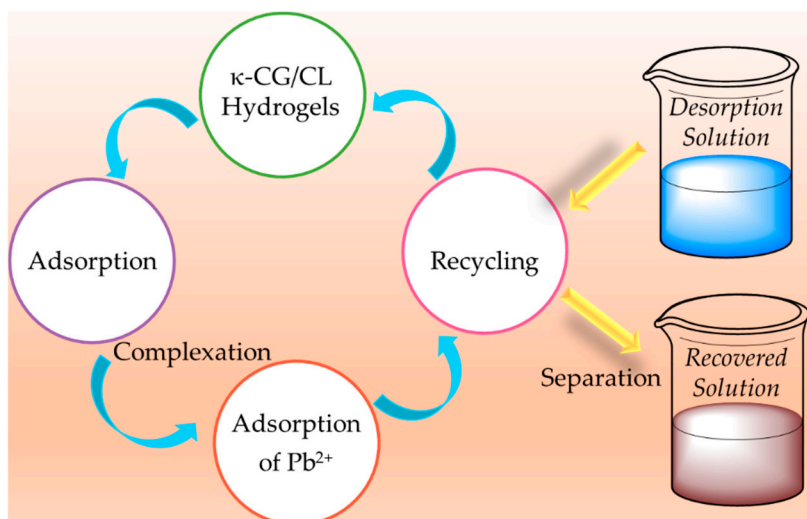

**Scheme S1.** An overview of the reusability studies for  $\text{Pb}^{2+}$  ions removal from  $\kappa\text{-CG/CL}$  hydrogel.

### Calibration of Atomic Absorption Spectrometry (AAS)

Under optimal conditions, 0.5 absorbance units should be produced by a  $\text{Pb}^{2+}$  ions concentration of  $600 \text{ mgL}^{-1}$  at the wavelength listed in the characteristic concentration check value. It is possible to determine if instrumental parameters are optimized and if the instrument is performing according to specifications by performing a characteristic concentration check. In this study, AAS calibration was carried out using an external calibration curve. Stock solutions were created from solutions with known concentrations of the sample element, which was used for preparing the external calibration curve. The stock solution was made with high-purity metal salts dissolved in high-purity acids. A diluted stock standard was used for working standards.

**Table S1.** Adsorption kinetics model parameters for Pb<sup>2+</sup> ions removal by  $\kappa$ -CG/CL hydrogel.

| Models                   | Parameters                                             | Values                  |
|--------------------------|--------------------------------------------------------|-------------------------|
| Pseudo-first order       | $Q_t$ (mg/g)                                           | 467.3±23.3              |
|                          | $k_1$ (min <sup>-1</sup> )                             | 0.0018                  |
|                          | $R^2$                                                  | 0.9863                  |
| Pseudo-second-order      | $Q_t$ (mg/g)                                           | 438.2±21.8              |
|                          | $k_2$ (g (mg min) <sup>-1</sup> )                      | 0.16 x 10 <sup>-3</sup> |
|                          | $R^2$                                                  | 0.9959                  |
| Elovich                  | $Q_t$ (mg/g)                                           | 421.3±19.3              |
|                          | $\alpha$ (mg/(g min))                                  | 0.0223                  |
|                          | $\beta$ (mg/g)                                         | 6.6271                  |
|                          | $R^2$                                                  | 0.9873                  |
| Intra-particle diffusion | $k_{d,1}$ (g (mg min <sup>-0.5</sup> ) <sup>-1</sup> ) | 0.125                   |
|                          | $C_1$                                                  | 192.3±9.6               |
|                          | $R^2$                                                  | 0.9738                  |
|                          | $k_{d,2}$ (g (mg min <sup>-0.5</sup> ) <sup>-1</sup> ) | 0.0416                  |
|                          | $C_2$                                                  | 462.7±23.1              |
|                          | $R^2$                                                  | 0.9841                  |
|                          | $k_{d,3}$ (g (mg min <sup>-0.5</sup> ) <sup>-1</sup> ) | 0.0277                  |
|                          | $C_3$                                                  | 484.3±24.2              |
|                          | $R^2$                                                  | 0.9878                  |

**Table S2.** Adsorption isotherm model parameters for Pb<sup>2+</sup> ions removal by  $\kappa$ -CG/CL hydrogel.

| Models     | Parameters                        | Temperature             |                         |                         |
|------------|-----------------------------------|-------------------------|-------------------------|-------------------------|
|            |                                   | 298                     | 308                     | 318                     |
| Langmuir   | $Q_m$ (mg/g)                      | 454±18.1                | 418±21.9                | 373±11.4                |
|            | $K_L$ (mg/L)                      | 0.0031                  | 0.0016                  | 0.0016                  |
|            | $R^2$                             | 0.8860                  | 0.9067                  | 0.8996                  |
|            | $R_L$                             | 2.37 x 10 <sup>-4</sup> | 2.69 x 10 <sup>-4</sup> | 2.62 x 10 <sup>-4</sup> |
| Freundlich | $Q_m$ (mg/g)                      | 486±28.5                | 440±23.3                | 388±48.7                |
|            | $C_e$ (mg/L)                      | 0.0029                  | 0.0018                  | 0.0062                  |
|            | $R^2$                             | 0.9038                  | 0.9267                  | 0.9684                  |
|            | $K_F$ (mg/g)/ (mg/L) <sup>n</sup> | 1.2134                  | 0.7951                  | 2.1294                  |

**Table S3.** Comparison of maximum Pb<sup>2+</sup> ions adsorption capacity of other reported adsorbents.

| Adsorbents                              | Q <sub>m</sub> (mg/g) | References |
|-----------------------------------------|-----------------------|------------|
| CS/PVA/CCNFs                            | 171.0                 | [1]        |
| SA-DMSA                                 | 116.4                 | [2]        |
| SDS-AZS                                 | 21.0                  | [3]        |
| CEL-MT-CBM                              | 39.0                  | [4]        |
| CA-PCL                                  | 70.5                  | [5]        |
| Fe <sub>3</sub> O <sub>4</sub> -CS/EDTA | 220.0                 | [6]        |
| SC-ALG                                  | 179.1                 | [7]        |
| ACSSB-ZnO                               | 55.5                  | [8]        |
| NCS-SA-MC                               | 114.4                 | [9]        |
| SA-PAM-GO                               | 240.6                 | [10]       |
| κ-CG/CL                                 | 486.0                 | This work  |

## References

1. Zhou, Y.; Fu, S.; Zhang, L.; Zhan, H.; Levit, M. V. Use of Carboxylated Cellulose Nanofibrils-Filled Magnetic Chitosan Hydrogel Beads as Adsorbents for Pb(II). *Carbohydrate Polymers* **2014**, *101*, 75–82, doi:10.1016/j.carbpol.2013.08.055.
2. Wang, Z.; Wu, S.; Zhang, Y.; Miao, L.; Zhang, Y.; Wu, A. Preparation of Modified Sodium Alginate Aerogel and Its Application in Removing Lead and Cadmium Ions in Wastewater. *International Journal of Biological Macromolecules* **2020**, *157*, 687–694, doi:10.1016/j.ijbiomac.2019.11.228.
3. Naushad, M. Surfactant Assisted Nano-Composite Cation Exchanger: Development, Characterization and Applications for the Removal of Toxic Pb<sup>2+</sup> from Aqueous Medium. *Chemical Engineering Journal* **2014**, *235*, 100–108, doi:10.1016/j.cej.2013.09.013.
4. Mwandira, W.; Nakashima, K.; Togo, Y.; Sato, T.; Kawasaki, S. Cellulose-Metalllothionein Biosorbent for Removal of Pb(II) and Zn(II) from Polluted Water. *Chemosphere* **2020**, *246*, 125733, doi:10.1016/j.chemosphere.2019.125733.
5. Aquino, R.R.; Tolentino, M.S.; Elacion, R.M.P.D.; Ladrillono, R.; Laurenciana, T.R.C.; Basilia, B.A. Adsorptive Removal of Lead (Pb<sup>2+</sup>) Ion from Water Using Cellulose Acetate/Polycaprolactone Reinforced Nanostructured Membrane. *IOP Conference Series: Earth and Environmental Science* **2018**, *191*, 1–8, doi:10.1088/1755-1315/191/1/012139.
6. Chen, B.; Zhao, H.; Chen, S.; Long, F.; Huang, B.; Yang, B.; Pan, X. A Magnetically Recyclable Chitosan Composite Adsorbent Functionalized with EDTA for Simultaneous Capture of Anionic Dye and Heavy Metals in Complex Wastewater. *Chemical Engineering Journal* **2019**, *356*, 69–80, doi:10.1016/j.cej.2018.08.222.
7. De Rossi, A.; Riguetto, C.V.T.; Dettmer, A.; Colla, L.M.; Piccin, J.S. Synthesis, Characterization, and Application of Saccharomyces Cerevisiae/Alginate Composites Beads for Adsorption of

- Heavy Metals. *Journal of Environmental Chemical Engineering* **2020**, *8*, 104009, doi:10.1016/j.jece.2020.104009.
8. Yuvaraja, G.; Pang, Y.; Chen, D.Y.; Kong, L.J.; Mehmood, S.; Subbaiah, M.V.; Rao, D.S.; Mouli Pavuluri, C.; Wen, J.C.; Reddy, G.M. Modification of Chitosan Macromolecule and Its Mechanism for the Removal of Pb(II) Ions from Aqueous Environment. *International Journal of Biological Macromolecules* **2019**, *136*, 177–188, doi:10.1016/j.ijbiomac.2019.06.016.
  9. Vijayalakshmi, K.; Devi, B.M.; Latha, S.; Gomathi, T.; Sudha, P.N.; Venkatesan, J.; Anil, S. Batch Adsorption and Desorption Studies on the Removal of Lead (II) from Aqueous Solution Using Nanochitosan/Sodium Alginate/Microcrystalline Cellulose Beads. *International Journal of Biological Macromolecules* **2017**, *104*, 1483–1494, doi:10.1016/j.ijbiomac.2017.04.120.
  10. Jiang, H.; Yang, Y.; Lin, Z.; Zhao, B.; Wang, J.; Xie, J.; Zhang, A. Preparation of a Novel Bio-Adsorbent of Sodium Alginate Grafted Polyacrylamide/Graphene Oxide Hydrogel for the Adsorption of Heavy Metal Ion. *Science of the Total Environment* **2020**, *744*, 140653, doi:10.1016/j.scitotenv.2020.140653.
